# Supplementary material
Source: PubMed Central journal article supplement (PMC6090360)
Supplement: tpmd180004.SD1.pdf [file tpmd180004.SD1.pdf]

Performance status of sputum AFB smear and Stool *Mtb* PCR among culture-confirmed pulmonary TB.

|                      |   | Sputum AFB smear |    |
|----------------------|---|------------------|----|
|                      |   | +                | -  |
| Stool <i>Mtb</i> PCR | + | 28               | 31 |
|                      | - | 6                | 21 |

SUPPLEMENTAL FIGURE 1. 2 × 2 table performance of sputum acid-fast bacilli (AFB) smear and stool *Mycobacterium tuberculosis* (*Mtb*) polymerase chain reaction (PCR) among culture-confirmed pulmonary tuberculosis (TB) cases.

SUPPLEMENTAL TABLE 1

Performance of sputum Xpert, smear, and culture compared with stool *Mtb* PCR among children < 15 years of age

| Age                  | HIV status   | GXP result           | Culture result | Stool <i>Mtb</i> PCR | Two-month stool <i>Mtb</i> PCR | Baseline AFB status    | Two-month smear status |
|----------------------|--------------|----------------------|----------------|----------------------|--------------------------------|------------------------|------------------------|
| 10.96                | Positive     | MTB detected         | Positive       | POS                  | NEG                            | Positive               | Positive               |
| 9.62                 | Positive     | MTB detected         | Positive       | NEG                  | NEG                            | Positive               | Negative               |
| 13.75                | Positive     | MTB not detected     | Negative       | POS                  | NEG                            | UTC                    | UTC                    |
| 14.14                | Positive     | MTB detected         | Positive       | POS                  | NEG                            | Positive               | Negative               |
| 9.2                  | Negative     | MTB not detected     | Negative       | NEG                  | POS                            | UTC                    | UTC                    |
| 0.18                 | Negative     | MTB detected         | Positive       | POS                  | NEG                            | Positive               | Negative               |
| 5.23                 | Positive     | MTB not detected     | Negative       | NEG                  | NEG                            | UTC                    | UTC                    |
| 7.62                 | Positive     | MTB not detected     | Not performed  | NEG                  | NEG                            | UTC                    | UTC                    |
| 0.62                 | Positive     | MTB not detected     | Negative       | NEG                  | NEG                            | UTC                    | UTC                    |
| 10.85                | Negative     | MTB detected         | Negative       | NEG                  | NEG                            | Negative               | Negative               |
| 1.33                 | Positive     | MTB not detected     | Negative       | NEG                  | NEG                            | UTC                    | UTC                    |
| 4.1                  | Negative     | MTB not detected     | Negative       | NEG                  | NEG                            | UTC                    | UTC                    |
| 12.48                | Positive     | MTB not detected     | Negative       | NEG                  | NEG                            | UTC                    | UTC                    |
| 7.36                 | Negative     | MTB not detected     | Negative       | POS                  | NEG                            | UTC                    | UTC                    |
| 8.85                 | Positive     | MTB not detected     | Negative       | NEG                  | NEG                            | UTC                    | UTC                    |
| 1.09                 | Negative     | MTB not detected     | Positive       | SNC                  | SNC                            | UTC                    | UTC                    |
| 8.95                 | Positive     | MTB not detected     | Negative       | NEG                  | NEG                            | UTC                    | UTC                    |
| 12.47                | Positive     | MTB not detected     | Negative       | NEG                  | NEG                            | UTC                    | UTC                    |
| 1.31                 | Positive     | MTB not detected     | Not performed  | NEG                  | NEG                            | UTC                    | UTC                    |
| 7.14                 | Positive     | MTB not detected     | Negative       | NEG                  | NEG                            | UTC                    | UTC                    |
| 1.02                 | Negative     | MTB not detected     | Negative       | NEG                  | NEG                            | UTC                    | UTC                    |
| 14.29                | Positive     | MTB not detected     | Negative       | SNC                  | NEG                            | UTC                    | UTC                    |
| 3.99                 | Negative     | MTB not detected     | Negative       | NEG                  | NEG                            | UTC                    | UTC                    |
| 8.88                 | Positive     | MTB not detected     | Negative       | SNC                  | NEG                            | UTC                    | UTC                    |
| 11.88                | Positive     | MTB detected         | Positive       | NEG                  | NEG                            | Negative               | Negative               |
| 2.63                 | Negative     | MTB detected         | Not performed  | NEG                  | NEG                            | Negative               | Negative               |
| 5.51                 | Negative     | MTB detected         | Not performed  | POS                  | NEG                            | UTC                    | UTC                    |
| 4.45                 | Negative     | MTB not detected     | Not performed  | NEG                  | NEG                            | UTC                    | UTC                    |
| 14.15                | Negative     | MTB not detected     | Negative       | NEG                  | NEG                            | UTC                    | UTC                    |
| 12.09                | Positive     | MTB detected         | Positive       | POS                  | SNC                            | Positive               | Negative               |
| 3.07                 | Negative     | MTB not detected     | Negative       | NEG                  | NEG                            | UTC                    | UTC                    |
| 8.21                 | Positive     | MTB not detected     | Negative       | NEG                  | NEG                            | UTC                    | UTC                    |
| 2.96                 | Positive     | MTB not detected     | Negative       | SNC                  | NEG                            | UTC                    | UTC                    |
| 1.23                 | Negative     | MTB not detected     | Not performed  | NEG                  | NEG                            | UTC                    | UTC                    |
| 0.85                 | Negative     | MTB not detected     | Negative       | SNC                  | SNC                            | UTC                    | UTC                    |
| 3.16                 | Negative     | MTB not detected     | Negative       | SNC                  | SNC                            | UTC                    | UTC                    |
| 4.41                 | Negative     | MTB not detected     | Negative       | NEG                  | NEG                            | UTC                    | UTC                    |
| 7.84                 | Positive     | MTB not detected     | Negative       | NEG                  | NEG                            | UTC                    | UTC                    |
| 2.21                 | Positive     | MTB not detected     | Negative       | NEG                  | NEG                            | UTC                    | UTC                    |
| 2.54                 | Negative     | MTB not detected     | Negative       | NEG                  | NEG                            | UTC                    | UTC                    |
| 6.88                 | Positive     | MTB not detected     | Negative       | SNC                  | NEG                            | UTC                    | UTC                    |
| 4.45                 | Negative     | MTB not detected     | Negative       | NEG                  | SNC                            | UTC                    | UTC                    |
| 8.91                 | Positive     | MTB not detected     | Negative       | NEG                  | POS                            | UTC                    | UTC                    |
| 4.4                  | Positive     | MTB not detected     | Not performed  | NEG                  | NEG                            | UTC                    | UTC                    |
| 14.28                | Negative     | MTB detected         | Not performed  | NEG                  | NEG                            | Negative               | Negative               |
| Median:<br>6.8 years | Positive: 25 | MTB detected: 10     | Positive: 7    | POS: 7               | POS: 2                         | Positive: 5            | Positive: 1            |
|                      | Negative: 20 | MTB not detected: 35 | Negative: 30   | NEG: 31<br>SNC: 7    | NEG: 38<br>SNC: 5              | Negative: 4<br>UTC: 36 | Negative: 8<br>UTC: 36 |

AFB = acid-fast bacilli; GX = Gene Xpert; *Mtb* = *Mycobacterium tuberculosis*; PCR = polymerase chain reaction; UTC = unable to collect.

SUPPLEMENTAL TABLE 2

Performance of baseline and 2-month AFB smear and stool PCR compared with phenotypic drug resistance

| Age   | HIV status | GXP result       | Culture       | Phenotypic drug susceptibility testing | Two-month stool <i>Mtb</i> PCR | Two-month smear status | INH sensitivity | RIF sensitivity | ETH sensitivity |
|-------|------------|------------------|---------------|----------------------------------------|--------------------------------|------------------------|-----------------|-----------------|-----------------|
| 10.96 | Positive   | MTB detected     | Positive      | MDR PAN                                | NEG                            | Positive+              | Resistant       | Resistant       | Resistant       |
| 13.75 | Positive   | MTB not detected | Negative      | Culture negative                       | NEG                            | NC                     | NA              | NA              | NA              |
| 19.34 | Negative   | MTB detected     | Positive      | MDR PAN                                | POS                            | Negative               | Resistant       | Resistant       | Resistant       |
| 44.82 | Positive   | MTB detected     | Positive      | Contaminated                           | Deceased                       | Negative               | NA              | NA              | NA              |
| 37.65 | Positive   | MTB not detected | Negative      | Culture negative                       | Deceased                       | NC                     | NA              | NA              | NA              |
| 34.25 | Positive   | MTB detected     | Positive      | Sensitive                              | POS                            | Negative               | Sensitive       | Sensitive       | Sensitive       |
| 36.11 | Positive   | MTB not detected | Negative      | Culture negative                       | NEG                            | NC                     | NA              | NA              | NA              |
| 28.91 | Positive   | MTB detected     | Not performed | NA                                     | Deceased                       | Negative               | NA              | NA              | NA              |
| 53.33 | Positive   | MTB detected     | Not performed | NA                                     | Deceased                       | Negative               | NA              | NA              | NA              |
| 23.49 | Negative   | MTB detected     | Positive      | MDR PAN                                | NEG                            | Negative               | Resistant       | Resistant       | Resistant       |
| 19.78 | Positive   | MTB detected     | Positive      | Sensitive                              | POS                            | Negative               | Sensitive       | Sensitive       | Sensitive       |
| 35.38 | Positive   | MTB detected     | Positive      | INH mono resistance                    | SNC                            | Negative               | Resistant       | Sensitive       | Sensitive       |
| 32.47 | Positive   | MTB detected     | Positive      | INH mono resistance                    | SNC                            | Positive++             | Resistant       | Sensitive       | Sensitive       |
| 58.58 | Negative   | MTB detected     | Positive      | Sensitive                              | POS                            | Negative               | Sensitive       | Sensitive       | Sensitive       |
| 26.78 | Positive   | MTB detected     | Positive      | Sensitive                              | POS                            | Negative               | Sensitive       | Sensitive       | Sensitive       |
| 9.2   | Negative   | MTB not detected | Negative      | Culture negative                       | POS                            | NC                     | NA              | NA              | NA              |
| 17.51 | Positive   | MTB not detected | Negative      | Culture negative                       | POS                            | NC                     | NA              | NA              | NA              |
| 46.66 | Negative   | MTB detected     | Positive      | Contaminated                           | POS                            | Negative               | Contaminated    |                 |                 |
| 31.25 | Positive   | MTB detected     | Positive      | Poly-R                                 | POS                            | Positive++             | Resistant       | Sensitive       | Resistant       |

AFB = acid-fast bacilli; ETH = ethambutol; GX = Gene Xpert; INH = isoniazid; *Mtb* = *Mycobacterium tuberculosis*; NA = not applicable; Pan MDR = pan-resistant multidrug-resistant to all first line drugs; PCR = polymerase chain reaction; UTC = unable to collect.
